# Supplementary material for: Chiral Discrimination Mechanisms by Silylated-Acetylated Cyclodextrins: Superficial Interactions vs. Inclusion
Source: MDPI journal article supplement (doi:10.3390/ijms232113169), 2022-10-29
Supplement: s1 [file s1]

# Chiral discrimination mechanisms by silylated-acetylated cyclodextrins: superficial interactions *vs* inclusion

Federica Balzano <sup>1</sup>, Gloria Uccello-Barretta <sup>1,\*</sup>, Giuseppe Sicoli <sup>1,‡</sup>, Letizia Vanni <sup>1</sup>, Alessandra Recchimurzo <sup>1</sup> and Federica Aiello <sup>2,\*</sup>

<sup>1</sup>Department of Chemistry and Industrial Chemistry, University of Pisa, via G. Moruzzi 13, 56124 Pisa, Italy

<sup>2</sup>National Research Council, Institute for Chemical and Physical Processes (CNR-IPCF), via G. Moruzzi, 1, 56124 Pisa, Italy

<sup>‡</sup>current address: Laboratoire Avancé de Spectroscopie pour les Interactions, la Réactivité et l'Environnement (LASIRE), Avenue Paul Langevin Bâtiment C4 – UMR CNRS 8516, Université de Lille, Sciences et Technologies, 59655 Villeneuve-d'Ascq Cedex, France;

\* Correspondence: gloria.uccello.barretta@unipi.it; 00390502219232 (G.U.B.); federica.aiello@cnr.it; 00390503152265 (F.A.)

## Supplementary Material

### Table of contents

- Figure S1- Conformational features of cyclodextrins: (A) no rotation, (B) clockwise rotation, (C) anti-clockwise rotation, (D) skew distortion.
- Figure S2. AcSiCD6 (left) and AcSiCD8 (right): <sup>1</sup>H NMR (600 MHz, C<sub>6</sub>D<sub>12</sub>, 25 °C) spectra (black) and 1D ROESY (mixing time = 300 ms) spectra of H1 (red) and H2 (blue) protons; \* indicates the solvent.
- Figure S3- 1D ROESY (600 MHz, C<sub>6</sub>D<sub>12</sub>, 25 °C, mixing time = 300 ms) spectra of methyl protons of AcSiCD6 (bottom, red), AcSiCD7 (center, green) and AcSiCD8 (top, blu).
- Table S1. Diffusion data (600 MHz, C<sub>6</sub>D<sub>12</sub>, 25 °C) obtained for compound B (60 mM) in equimolar mixtures with AcSiCD6, AcSiCD7 and AcSiCD8 ( $D_{\text{obs}}$  = diffusion coefficient measured in the mixture substrate/CD;  $D_f$  = diffusion coefficient of the substrate in the free state;  $D_b \cong D_{\text{CD}}$ ).
- Table S2. Equimolar mixtures of MCP (20 mM) with AcSiCD6, AcSiCD7 and AcSiCD8 (600 MHz, C<sub>6</sub>D<sub>12</sub>, 25 °C): non-equivalences ( $|\delta_R - \delta_S|$ , ppm) and complexation shifts ( $\Delta\delta = \delta_{\text{mix}} - \delta_{\text{free}}$ , ppm).
- Table S3. Diffusion data (600 MHz, C<sub>6</sub>D<sub>12</sub>, 25 °C) obtained for MCP (20 mM) in equimolar mixtures with AcSiCD6, AcSiCD7 and AcSiCD8 ( $D_{\text{obs}}$  = diffusion coefficient measured in the mixture substrate/CD;  $D_f$  = diffusion coefficient of the substrate in the free state;  $D_b \cong D_{\text{CD}}$ ).
- NMR characterization data of: AcSiCD6, AcSiCD7, AcSiCD8, compound B, MCP.

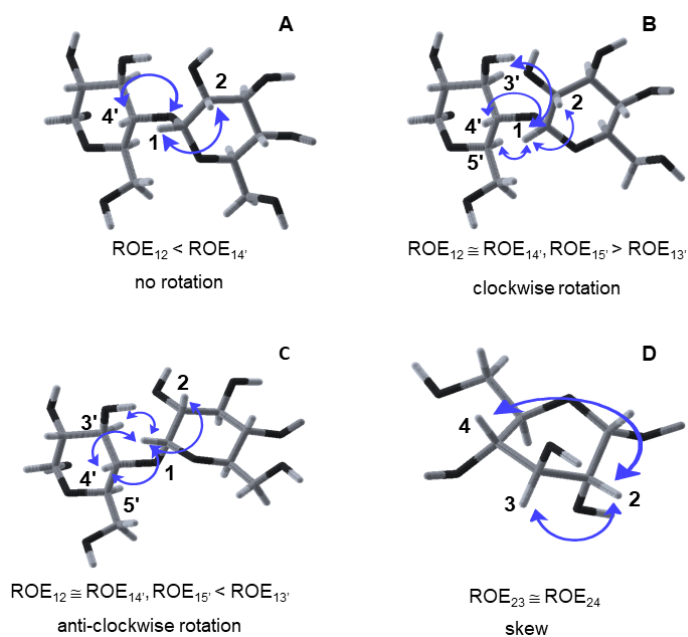

Figure S1- Conformational features of cyclodextrins: (A) no rotation, (B) clockwise rotation, (C) anti-clockwise rotation, (D) skew distortion.

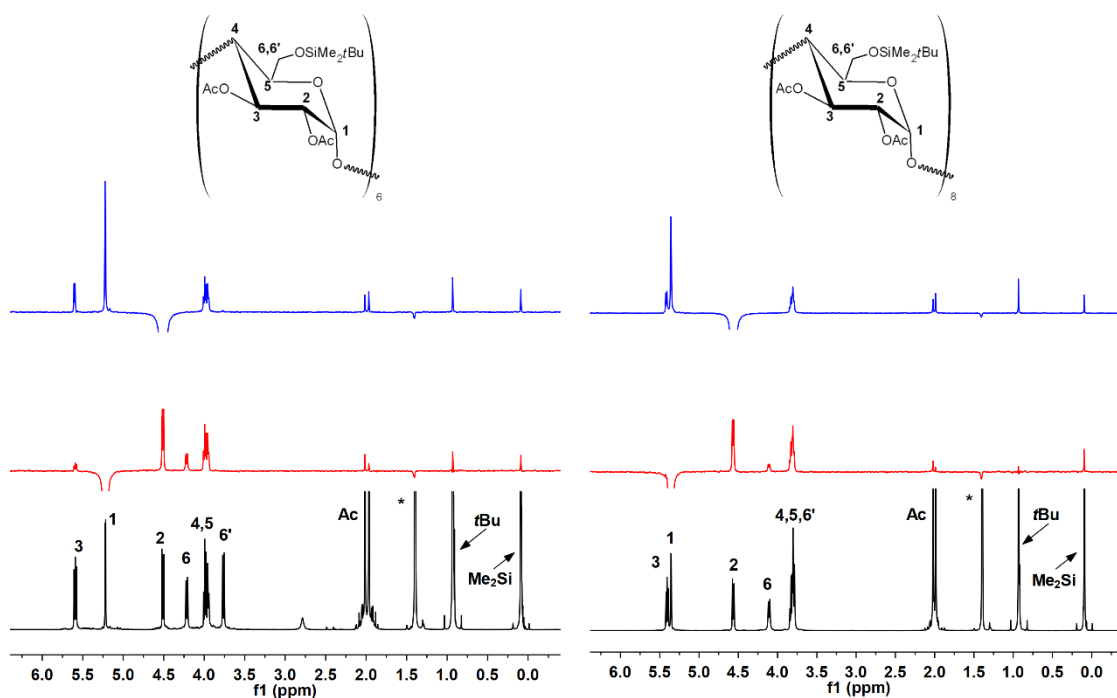

Figure S2. AcSiCD6 (left) and AcSiCD8 (right):  $^1\text{H}$  NMR (600 MHz,  $\text{C}_6\text{D}_{12}$ , 25  $^\circ\text{C}$ ) spectra (black) and 1D ROESY (mixing time = 300 ms) spectra of H1 (red) and H2 (blue) protons; \* indicates the solvent.

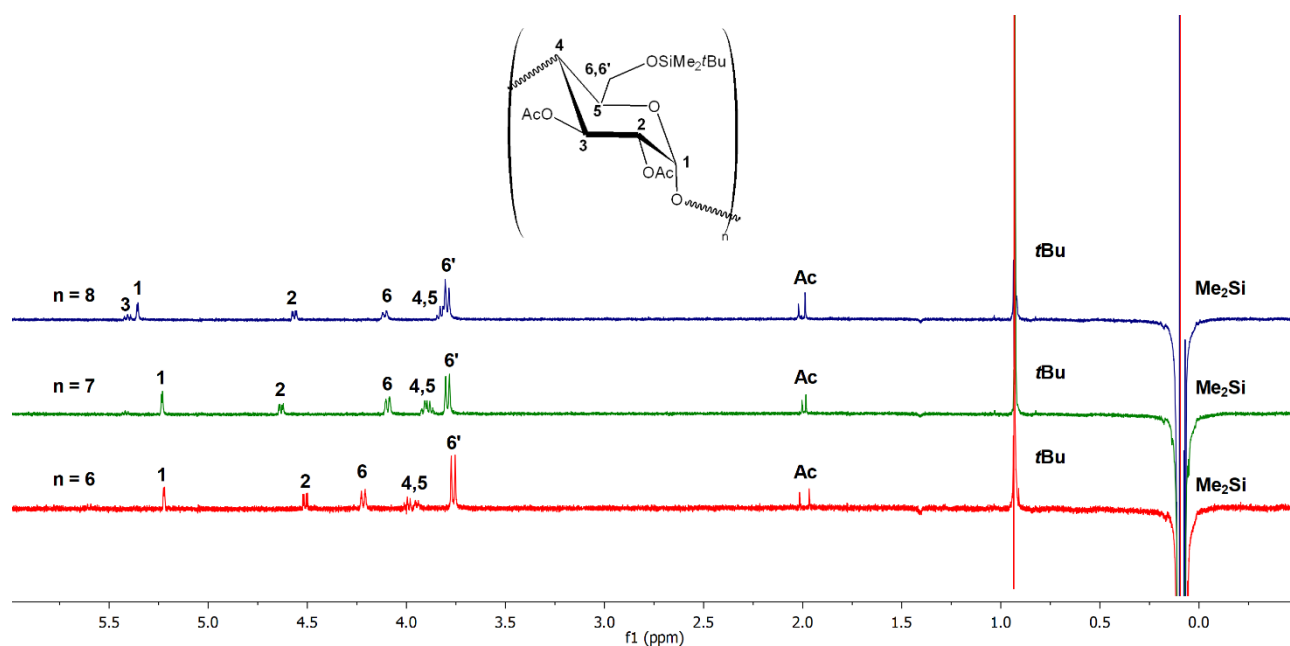

Figure S3- 1D ROESY (600 MHz, C<sub>6</sub>D<sub>12</sub>, 25 °C, mixing time = 300 ms) spectra of methyl protons of AcSiCD6 (bottom, red), AcSiCD7 (center, green) and AcSiCD8 (top, blu).

Table S1. Diffusion data (600 MHz, C<sub>6</sub>D<sub>12</sub>, 25 °C) obtained for compound B (60 mM) in equimolar mixtures with AcSiCD6, AcSiCD7 and AcSiCD8 ( $D_{\text{obs}}$  = diffusion coefficient measured in the mixture substrate/CD;  $D_f$  = diffusion coefficient of the substrate in the free state;  $D_b \cong D_{\text{CD}}$ ).

| CD      | <i>Diffusion measurements</i> |                       |
|---------|-------------------------------|-----------------------|
|         | $D_{\text{obs}} - D_f$        | $D_b - D_f$           |
| AcSiCD6 | $-5.03 \pm 0.47$              | $-11.58 \pm 0.51$     |
| AcSiCD7 | $-8.94 \pm 0.43$ (S)          | $-11.96 \pm 0.51$ (S) |
|         | $-8.19 \pm 0.44$ (R)          | $-11.96 \pm 0.51$ (R) |
| AcSiCD8 | n.d. <sup>a</sup> (S)         | n.d. <sup>a</sup> (S) |
|         | $-7.67 \pm 0.43$ (R)          | $-12.06 \pm 0.51$ (R) |

<sup>a</sup> not determined due to strong superimposition of compound B and CD signals.

Table S2. Equimolar mixtures of MCP (20 mM) with AcSiCD6, AcSiCD7 and AcSiCD8 (600 MHz, C<sub>6</sub>D<sub>12</sub>, 25 °C): non-equivalences ( $|\delta_R - \delta_S|$ , ppm) and complexation shifts ( $\Delta\delta = \delta_{\text{mix}} - \delta_{\text{free}}$ , ppm).

| CD      | MCP                     |                |                         |                |
|---------|-------------------------|----------------|-------------------------|----------------|
|         | <i>CH</i>               |                | <i>OMe</i>              |                |
|         | $ \delta_R - \delta_S $ | $\Delta\delta$ | $ \delta_R - \delta_S $ | $\Delta\delta$ |
| AcSiCD6 | 0                       | 0.004          | 0                       | 0.007          |
| AcSiCD7 | 0.218                   | 0.285 (S)      | 0.044                   | 0.089 (S)      |
|         |                         | 0.067 (R)      |                         | 0.045 (R)      |
| AcSiCD8 | 0.070                   | 0.250 (S)      | 0.020                   | 0.107 (S)      |
|         |                         | 0.180 (R)      |                         | 0.087 (R)      |

Table S3. Diffusion data (600 MHz, C<sub>6</sub>D<sub>12</sub>, 25 °C) obtained for MCP (20 mM) in equimolar mixtures with AcSiCD6, AcSiCD7 and AcSiCD8 ( $D_{\text{obs}}$  = diffusion coefficient measured in the mixture substrate/CD;  $D_f$  = diffusion coefficient of the substrate in the free state;  $D_b \cong D_{\text{CD}}$ ).

| CD      | <i>Diffusion measurements</i> |                       |
|---------|-------------------------------|-----------------------|
|         | $D_{\text{obs}} - D_f$        | $D_b - D_f$           |
| AcSiCD6 | $-0.43 \pm 0.88$              | $-15.90 \pm 0.61$     |
| AcSiCD7 | $-9.18 \pm 0.58$ (S)          | $-16.10 \pm 0.61$ (S) |
|         | $-5.43 \pm 0.54$ (R)          | $-16.10 \pm 0.61$ (R) |
| AcSiCD8 | $-4.30 \pm 0.96$ (S)          | $-16.30 \pm 0.61$ (S) |
|         | $-4.07 \pm 0.95$ (R)          | $-16.30 \pm 0.61$ (R) |

### NMR characterization data

AcSiCD6 (n = 6)

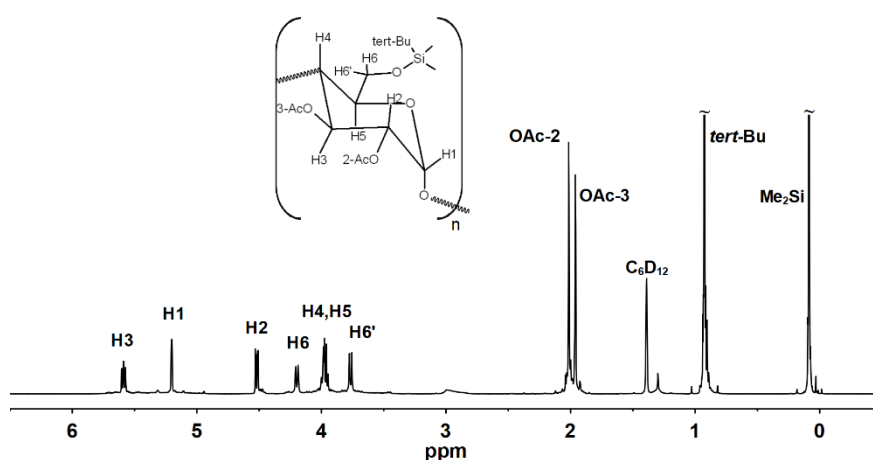

<sup>1</sup>H NMR (600 MHz, C<sub>6</sub>D<sub>12</sub>, 25 °C)  $\delta$  (ppm): 5.59 (6H, H3, dd,  $J_{32} = 10.3$  Hz,  $J_{34} = 8.5$  Hz), 5.20 (6H, H1, d,  $J_{12} = 3.2$  Hz), 4.50 (6H, H2, dd,  $J_{23} = 10.3$  Hz,  $J_{21} = 3.2$  Hz), 4.20 (6H, H6, br d,  $J_{66'} = 12.4$  Hz), 3.98 (6H,

H5), 3.86 (6H, H4, dd,  $J_{43} = J_{45} = 8.5$  Hz), 3.77 (6H, H6', br d,  $J_{6'6} = 12.4$  Hz), 2.01 (18H, Ac-2, s), 1.96 (18H, Ac-3, s), 0.93 (54H, *tert*-Bu, s), 0.09 (36H, Me<sub>2</sub>Si, s).

<sup>13</sup>C NMR (150 MHz, C<sub>6</sub>D<sub>12</sub>, 25 °C) δ (ppm): 169.2 (CO, Ac-3), 169.0 (CO, Ac-2), 95.9 (C1), 74.8 (C4), 72.1 (C5), 71.8 (C3), 71.5 (C2), 62.5 (C6), 25.7 ((CH<sub>3</sub>)<sub>3</sub>C), 20.3 (Me, Ac-2), 19.7 (Me, Ac-3), 18.3 ((CH<sub>3</sub>)<sub>3</sub>C), -5.7 and -5.4 ((Me)<sub>2</sub>Si).

#### AcSiCD7 (n=7)

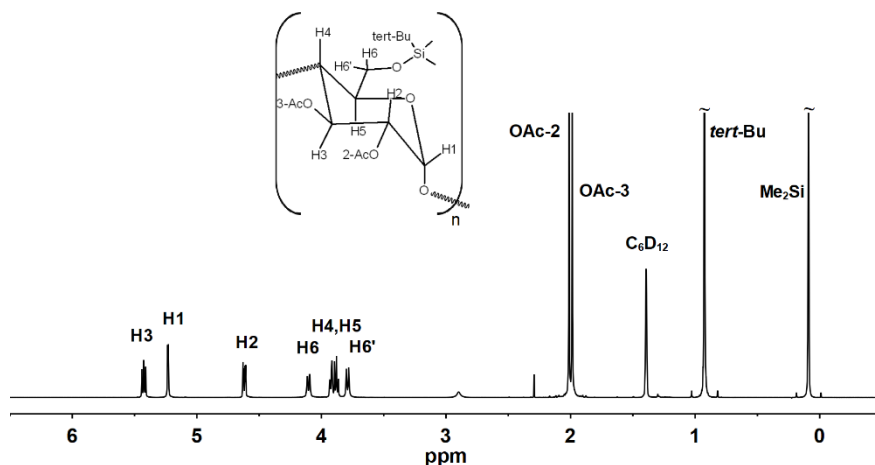

<sup>1</sup>H NMR (600 MHz, C<sub>6</sub>D<sub>12</sub>, 25 °C) δ (ppm): 5.43 (7H, H3, dd,  $J_{32} = 9.9$  Hz,  $J_{34} = 8.6$  Hz), 5.23 (7H, H1, d,  $J_{12} = 3.7$  Hz), 4.62 (7H, H2, dd,  $J_{23} = 9.9$  Hz,  $J_{21} = 3.7$  Hz), 4.10 (7H, H6, br d,  $J_{66'} = 10.0$  Hz), 3.93 (7H, H5, br d,  $J_{54} = 9.6$  Hz), 3.88 (7H, H4, dd,  $J_{45} = 9.6$  Hz,  $J_{43} = 8.6$  Hz), 3.79 (7H, H6', br d,  $J_{6'6} = 10.0$  Hz), 2.01 (21H, Ac-2, s), 1.99 (21H, Ac-3, s), 0.93 (63H, *tert*-Bu, s), 0.09 (42H, Me<sub>2</sub>Si, s).

<sup>13</sup>C NMR (150 MHz, C<sub>6</sub>D<sub>12</sub>, 25 °C) δ (ppm): 169.3 (CO, Ac-3), 168.9 (CO, Ac-2), 96.7 (C1), 75.6 (C4), 72.0 (C5), 71.5 (C2+C3), 62.3 (C6), 25.7 ((CH<sub>3</sub>)<sub>3</sub>C), 20.3 (Me, Ac-2), 20.0 (Me, Ac-3), 18.2 ((CH<sub>3</sub>)<sub>3</sub>C), -5.6 and -5.3 ((CH<sub>3</sub>)<sub>2</sub>Si).

#### AcSiCD8 (n=8)

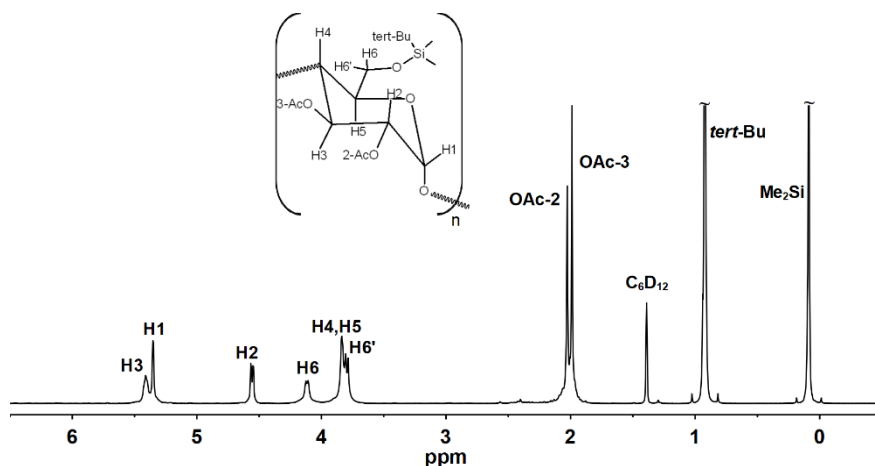

<sup>1</sup>H NMR (600 MHz, C<sub>6</sub>D<sub>12</sub>, 25 °C) δ (ppm): 5.41 (8H, H3, br t,  $J_{32} = J_{34} = 10.0$  Hz), 5.35 (8H, H1, br d,  $J_{12} = 3.4$  Hz), 4.56 (8H, H2, dd,  $J_{23} = 10.0$  Hz,  $J_{21} = 3.4$  Hz), 4.11 (8H, H6, br d,  $J_{66'} = 11.4$  Hz), 3.84 (16H,

H4/H5, m), 3.79 (8H, H<sub>6'</sub>, br d, J<sub>6'6</sub> = 11.4 Hz), 2.03 (24H, [CH<sub>3</sub>] Ac-2, s), 1.99 (24H, [CH<sub>3</sub>] Ac-3, s), 0.92 (72H, *tert*-Bu, s), 0.09 (48H, Me<sub>2</sub>Si, s).

<sup>13</sup>C NMR (150 MHz, C<sub>6</sub>D<sub>12</sub>, 25 °C) δ (ppm): 169.2 (CO, Ac-3), 169.0 (CO, Ac-2), 95.9 (C1), 74.4 (C4), 72.1 (C5), 70.8 (C2), 71.9 (C3), 62.1 (C6), 25.7 ((CH<sub>3</sub>)<sub>3</sub>C), 20.4 (Me, Ac-2), 19.9 (Me, Ac-3), 18.3 ((CH<sub>3</sub>)<sub>3</sub>C), -5.6 and -5.3 (Me<sub>2</sub>Si).

## Compound B

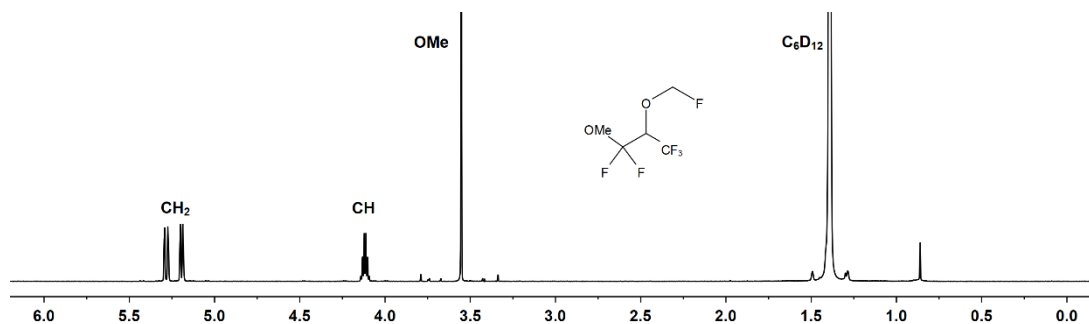

<sup>1</sup>H NMR (600 MHz, C<sub>6</sub>D<sub>12</sub>, 25 °C) δ (ppm): 5.29 (2H, CH<sub>2</sub>, dd, J<sub>HF</sub> = 12.5 Hz, J<sub>HH'</sub> = 2.7 Hz), 5.21 (1H, CH<sub>2</sub>, dd, J<sub>HF</sub> = 9.7 Hz, J<sub>HH'</sub> = 2.7 Hz), 4.13 (1H, CH, m), 3.55 (3H, MeO, s).

## MCP

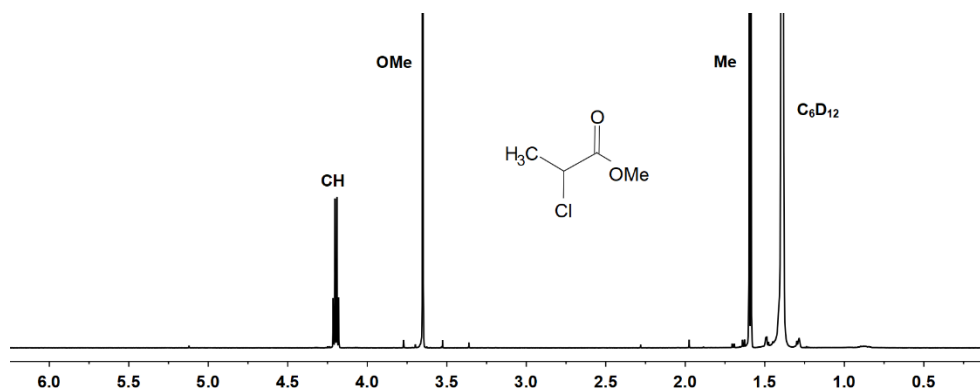

<sup>1</sup>H NMR (600 MHz, C<sub>6</sub>D<sub>12</sub>, 25 °C) δ (ppm): 4.20 (1H, CH, q, J<sub>CH-Me</sub> = 6.9 Hz), 3.65 (3H, OMe, s), 1.59 (3H, Me, d, J<sub>Me-CH</sub> = 6.9 Hz).
